# Supplementary material for: Validation of the Japanese Version of the Center for Epidemiologic Studies Depression Scale—Revised: A Preliminary Analysis
Source: MDPI journal article supplement (doi:10.3390/bs11080107), 2021-07-24
Supplement: s1 [file s1]

**Table S1.** English version of CESD-R

| Below is a list of the ways you might have felt or behaved. Please check the boxes to tell me how often you have felt this way in the past week or so. |                                                    | Last Week                     |          |          |          | 2 Nearly every day for 2 weeks |
|--------------------------------------------------------------------------------------------------------------------------------------------------------|----------------------------------------------------|-------------------------------|----------|----------|----------|--------------------------------|
|                                                                                                                                                        |                                                    | Not at all or less than 1 day | 1-2 days | 3-4 days | 5-7 days |                                |
| 1                                                                                                                                                      | My appetite was poor.                              | 0                             | 1        | 2        | 3        | 4                              |
| 2                                                                                                                                                      | I could not shake off the blues.                   | 0                             | 1        | 2        | 3        | 4                              |
| 3                                                                                                                                                      | I had trouble keeping my mind on what I was doing. | 0                             | 1        | 2        | 3        | 4                              |
| 4                                                                                                                                                      | I felt depressed.                                  | 0                             | 1        | 2        | 3        | 4                              |
| 5                                                                                                                                                      | My sleep was restless.                             | 0                             | 1        | 2        | 3        | 4                              |
| 6                                                                                                                                                      | I felt sad.                                        | 0                             | 1        | 2        | 3        | 4                              |
| 7                                                                                                                                                      | I could not get going.                             | 0                             | 1        | 2        | 3        | 4                              |
| 8                                                                                                                                                      | Nothing made me happy.                             | 0                             | 1        | 2        | 3        | 4                              |
| 9                                                                                                                                                      | I felt like a bad person.                          | 0                             | 1        | 2        | 3        | 4                              |
| 10                                                                                                                                                     | I lost interest in my usual activities.            | 0                             | 1        | 2        | 3        | 4                              |
| 11                                                                                                                                                     | I slept much more than usual.                      | 0                             | 1        | 2        | 3        | 4                              |
| 12                                                                                                                                                     | I felt like I was moving too slowly.               | 0                             | 1        | 2        | 3        | 4                              |
| 13                                                                                                                                                     | I felt fidgety.                                    | 0                             | 1        | 2        | 3        | 4                              |
| 14                                                                                                                                                     | I wished I were dead.                              | 0                             | 1        | 2        | 3        | 4                              |
| 15                                                                                                                                                     | I wanted to hurt myself.                           | 0                             | 1        | 2        | 3        | 4                              |
| 16                                                                                                                                                     | I was tired all the time.                          | 0                             | 1        | 2        | 3        | 4                              |
| 17                                                                                                                                                     | I did not like myself.                             | 0                             | 1        | 2        | 3        | 4                              |
| 18                                                                                                                                                     | I lost a lot of weight without trying to.          | 0                             | 1        | 2        | 3        | 4                              |
| 19                                                                                                                                                     | I had a lot of trouble getting to sleep.           | 0                             | 1        | 2        | 3        | 4                              |
| 20                                                                                                                                                     | I could not focus on the important things.         | 0                             | 1        | 2        | 3        | 4                              |

**Table S2.** Japanese version of CESD-R used in the present study

| 以下に、あなたが感じたり、振る舞ったりした可能性のある事柄を挙げます。ここ2週間ほどで、自分自身に当てはまると感じた頻度について、右の選択肢から選んでください。 |                        | 先週                    |          |          |          | 2週間<br>ほぼ毎日 |
|----------------------------------------------------------------------------------|------------------------|-----------------------|----------|----------|----------|-------------|
|                                                                                  |                        | 全くなし、<br>または、<br>1日未満 | 1～2<br>日 | 3～4<br>日 | 5～7<br>日 |             |
| 1                                                                                | 食欲不振だった                | 0                     | 1        | 2        | 3        | 4           |
| 2                                                                                | 憂うつな気分を拭い去ることができなかった   | 0                     | 1        | 2        | 3        | 4           |
| 3                                                                                | 自分がしていることに集中できなかった     | 0                     | 1        | 2        | 3        | 4           |
| 4                                                                                | 気分が落ち込んでいた             | 0                     | 1        | 2        | 3        | 4           |
| 5                                                                                | ぐっすり眠れなかった             | 0                     | 1        | 2        | 3        | 4           |
| 6                                                                                | 悲しい気分だった               | 0                     | 1        | 2        | 3        | 4           |
| 7                                                                                | 前に進めなかった               | 0                     | 1        | 2        | 3        | 4           |
| 8                                                                                | 何についても、幸せを感じられなかった     | 0                     | 1        | 2        | 3        | 4           |
| 9                                                                                | 自分自身が悪い人のような気がした       | 0                     | 1        | 2        | 3        | 4           |
| 10                                                                               | 日常生活に関心をなくした           | 0                     | 1        | 2        | 3        | 4           |
| 11                                                                               | いつもよりずっと多く寝た           | 0                     | 1        | 2        | 3        | 4           |
| 12                                                                               | 自分の動作が非常に緩慢だと感じた       | 0                     | 1        | 2        | 3        | 4           |
| 13                                                                               | 気分が落ち着かなかった            | 0                     | 1        | 2        | 3        | 4           |
| 14                                                                               | 死んでしまいたいと思った           | 0                     | 1        | 2        | 3        | 4           |
| 15                                                                               | 自分自身を傷つけてしまいたかった       | 0                     | 1        | 2        | 3        | 4           |
| 16                                                                               | いつも疲れていた               | 0                     | 1        | 2        | 3        | 4           |
| 17                                                                               | 自分自身のことが好きではなかった       | 0                     | 1        | 2        | 3        | 4           |
| 18                                                                               | 努力したわけでもないのに、体重がかなり減った | 0                     | 1        | 2        | 3        | 4           |
| 19                                                                               | 寝付くのに苦労した              | 0                     | 1        | 2        | 3        | 4           |
| 20                                                                               | 大事なことに集中できなかった         | 0                     | 1        | 2        | 3        | 4           |

**Table S3.** Modified Japanese version of CESD-R for future studies

| ここ2週間の心や体の状態についてお聞きいたします。<br>0～4の当てはまるところに○をつけてください。 |                     | 先週                    |          |          |          | 2週間<br>ほぼ毎日 |
|------------------------------------------------------|---------------------|-----------------------|----------|----------|----------|-------------|
|                                                      |                     | 全くなし、<br>または、<br>1日未満 | 1～2<br>日 | 3～4<br>日 | 5～7<br>日 |             |
| 1                                                    | 食欲がない               | 0                     | 1        | 2        | 3        | 4           |
| 2                                                    | 気分が晴れない             | 0                     | 1        | 2        | 3        | 4           |
| 3                                                    | 何かと気が散る             | 0                     | 1        | 2        | 3        | 4           |
| 4                                                    | 憂うつだ                | 0                     | 1        | 2        | 3        | 4           |
| 5                                                    | ぐっすり眠れない            | 0                     | 1        | 2        | 3        | 4           |
| 6                                                    | なんとなく悲しい            | 0                     | 1        | 2        | 3        | 4           |
| 7                                                    | なんだか億劫だ             | 0                     | 1        | 2        | 3        | 4           |
| 8                                                    | 何をしても楽しくない          | 0                     | 1        | 2        | 3        | 4           |
| 9                                                    | 自分は不道德のような気がする      | 0                     | 1        | 2        | 3        | 4           |
| 10                                                   | 普段していた趣味などに、興味をもてない | 0                     | 1        | 2        | 3        | 4           |
| 11                                                   | いつもより、ずっと長く眠る       | 0                     | 1        | 2        | 3        | 4           |
| 12                                                   | 動作が緩慢になったようだ        | 0                     | 1        | 2        | 3        | 4           |
| 13                                                   | イライラする              | 0                     | 1        | 2        | 3        | 4           |
| 14                                                   | 消えてしまいたい            | 0                     | 1        | 2        | 3        | 4           |
| 15                                                   | 自分を責めてしまう           | 0                     | 1        | 2        | 3        | 4           |
| 16                                                   | ずっと疲れている            | 0                     | 1        | 2        | 3        | 4           |
| 17                                                   | 自分のことが好きでない         | 0                     | 1        | 2        | 3        | 4           |
| 18                                                   | ダイエットしていないのに、体重が減った | 0                     | 1        | 2        | 3        | 4           |
| 19                                                   | なかなか寝付けない           | 0                     | 1        | 2        | 3        | 4           |
| 20                                                   | 物事に集中できない           | 0                     | 1        | 2        | 3        | 4           |
